# Supplementary material for: Maverick total disc replacement in a real-world patient population: a prospective, multicentre, observational study
Source: Springer Nature journal article supplement (doi:10.1007/s00586-015-3918-x), 2015-06-06
Supplement: MOESM1 [file 8606834]

## Electronic Supplementary Material

### Other tertiary outcomes

Both sensory and motor functions improved or were reported as stable at the implanted level from pre-operation to the 6-, 12-, and 24-month assessments in the vast majority of patients (Table). The percentage of patients practicing physical activities increased from 49% (63/130) to 60% (58/97) at 2 years. Among the group of patients not active before surgery because of back pain, almost 80% did not have their physical activity hindered by back pain 2 years after surgery (Table).

**Table** Changes in tertiary outcomes from pre-operation (baseline) to 2 years

| Outcome                                | Pre-operation | 6 months post-surgery | 12 months post-surgery | 24 months post-surgery |
|----------------------------------------|---------------|-----------------------|------------------------|------------------------|
| Neurological status at implanted level |               |                       |                        |                        |
| Motor changes:                         |               |                       |                        |                        |
| <i>n</i> (%) improved                  | 10 (8%)       | 12 (10%)              | 12 (12%)               | 13 (14%)               |
| <i>n</i> (%) deteriorated              | 3 (2%)        | 1 (1%)                | 2 (2%)                 | 2 (2%)                 |
| total <i>n</i>                         | 131           | 126                   | 104                    | 96                     |
| Sensory changes:                       |               |                       |                        |                        |
| <i>n</i> (%) improved                  | 21 (16%)      | 25 (20%)              | 22 (21%)               | 23 (24%)               |
| <i>n</i> (%) deteriorated              | 1 (1%)        | 1 (1%)                | 2 (2%)                 | 3 (3%)                 |
| total <i>n</i>                         | 132           | 125                   | 103                    | 95                     |

---

|                                                             |              |                          |                          |                         |
|-------------------------------------------------------------|--------------|--------------------------|--------------------------|-------------------------|
| Patients inactive because of back pain, <i>n</i> /total (%) | 51/130 (39%) | 27/51 (53%) <sup>a</sup> | 12/36 (33%) <sup>a</sup> | 7/30 (23%) <sup>a</sup> |
|-------------------------------------------------------------|--------------|--------------------------|--------------------------|-------------------------|

---

<sup>a</sup>This describes the physical activity level of only a subset of patients: those who were inactive pre-operatively because of back pain. “Physical activity” includes short walks to running
